# Supplementary material
Source: publisher site journal article supplement (https://www.degruyterbrill.com/publication/isbn/9783839415702/downloadAsset/9783839415702_Leseprobe.pdf)
Supplement: Supplementary file 1 [file 9783839415702_Leseprobe.pdf]

**Aus:**

THOMAS R. EIMER, KURT RÖTTGERS,  
BARBARA VÖLZMANN-STICKELBROCK (HG.)

**Die Debatte um geistiges Eigentum**

Interdisziplinäre Erkundungen.

Rechtswissenschaft –

Politikwissenschaft –

Philosophie

Oktober 2010, 212 Seiten, kart., 24,80 €, ISBN 978-3-8376-1570-8

Der Begriff des »Geistigen Eigentums« ist mit den technologischen, kulturellen, sozialen und ökonomischen Umwälzungen im Übergang zur Informationsgesellschaft seit den 1990er Jahren in den Mittelpunkt einer Debatte geraten – begleitet von Diskussionen um die Reform des Urheberrechts, um Filesharing, um Open Access, um die Ausweitung des Patentrechts usw.

Die in diesem Band vertretenen Beiträge von Juristen, Politikwissenschaftlern und Philosophen bringen die unterschiedlichen Perspektiven in einen interdisziplinären Dialog über ein Feld, in dem wie nirgendwo sonst Recht (Schutz des geistigen Eigentums) und alltägliche Praxis (massenhaftes Kopieren urheberrechtlich geschützter Werke) voneinander abweichen.

**Thomas R. Eimer** (M.A.) ist wissenschaftlicher Mitarbeiter am Otto-Suhr-Institut der Freien Universität Berlin.

**Kurt Röttgers** (Prof. Dr.) war bis 2009 Professor für Philosophie, insbesondere Praktische Philosophie, der FernUniversität in Hagen.

**Barbara Völmann-Stickelbrock** (Prof. Dr.) lehrt Bürgerliches Recht, Wirtschaftsrecht, Gewerblicher Rechtsschutz, Urheberrecht und Zivilprozessrecht an der FernUniversität in Hagen.

Weitere Informationen und Bestellung unter:

[www.transcript-verlag.de/ts1570/ts1570.php](http://www.transcript-verlag.de/ts1570/ts1570.php)

# Inhalt

---

**Einführung** | 7

## **I. PHILOSOPHISCHE GRUNDLAGEN**

**Privileg oder Recht? – »Geistiges Eigentum« bei Hegel**

Elisabeth Weisser-Lohmann | 11

**Form Inhalt Produkt**

Christian Schmidt | 31

## **II. JURISTISCHE VORGABEN**

**Das Geistige Eigentum in der Verfassung**

Bernd Grzeszick | 57

**Domains, Accounts und Avatare – wohin steuert das geistige Eigentum im Multimediazeitalter?**

Barbara Völzmann-Stickelbrock | 79

**»Alles nur geklaut« –**

**Über »Raubkopierer« und »Gedankendiebe«. Zur Rolle des Strafrechts beim Schutze geistigen Eigentums**

Kathrin Rentrop | 107

## **III. POLITIKWISSENSCHAFTLICHE ANALYSEN**

**Postindustrielle Verteilungskonflikte:  
Werte, Interessen und Institutionen**

Thomas R. Eimer | 129

**Die Kommodifizierung von Wissen:  
Zur Verwertung universitärer Forschungsergebnisse  
in Deutschland und den USA**

Annika Philipps | 161

**IV. SOZIALPHILOSOPHISCHE DEUTUNG**

**Das Eigentum am Text**

Kurt Röttgers | 181

**Autorinnen und Autoren | 211**

## Einführung

---

Mit den technologischen, kulturellen, sozialen und ökonomischen Umwälzungen der Informationsgesellschaft ab den 1990er-Jahren ist der Begriff des Geistigen Eigentums in den Mittelpunkt einer Debatte gerückt, die immer umfassendere Bereiche des menschlichen Zusammenlebens berührt. Ob Filesharing, Gen- und Softwarepatente, Zugang zu lebensnotwendigen Medikamenten oder Produkt- und Markenpiraterie – zahlreiche Themen, die auch in einer breiteren Öffentlichkeit kontrovers diskutiert werden, hängen unmittelbar mit der Ausgestaltung des Immaterialgüterrechts zusammen.

Mit unserem interdisziplinären Band (Philosophie, Rechts- und Politikwissenschaft), der aus einer Tagung des Christian-Jakob-Kraus-Instituts hervorgegangen ist, verfolgen wir die Absicht, einen Dialog zwischen den beteiligten Wissenschaften anzuregen. Dabei hoffen wir, dass ein multiperspektivischer Ansatz auch in die öffentliche Diskussion einsickert und zu einer stärker fundierten und besser informierten Entscheidungsfindung beitragen kann.

# Privileg oder Recht?

›Geistiges Eigentum‹ bei Hegel

---

ELISABETH WEISSER-LOHMANN

Das internationale Recht zeigt mit Blick auf die Frage, welches Gut im »geistigen Eigentum« geschützt wird, bemerkenswerte Abweichungen. Während in Deutschland und Frankreich für den Schutz geistigen Eigentums vor allem persönlichkeitsrechtliche Gesichtspunkte geltend gemacht werden, erfolgt der rechtliche Schutz dieser Güter im englischsprachigen Raum in erster Linie unter vermögensrechtlichen Aspekten.<sup>1</sup> Beide Schutzkonzeptionen rekurrieren auf unterschiedliche Aspekte des geistigen Eigentums: Für die privatrechtliche Position steht die individuelle Leistung des Individuums im Vordergrund, mit dem vermögensrechtlichen Aspekt rückt dagegen die gesellschaftliche

---

1 Um welche Marktanteile es hier geht, wird deutlich, wenn berücksichtigt wird, dass bereits Ende der 90er Jahre des vergangenen Jahrhunderts die interaktive Multimedia-Industrie ca. 10 % des amerikanischen Bruttoinlandsprodukts erwirtschaftete. Zu den derzeit geltenden Regelungen vgl. August Katern: Copyright und Business eine Sicht der Wirtschaft, in: Gerhard Banse u. Christian J. Langenbach (Hg.): Geistiges Eigentum und Copyright im multimedialen Zeitalter. Positionen, Probleme, Perspektiven. Eine fachübergreifende Bestandaufnahme, Bad Neuenahr-Ahrweiler 1999.

Relevanz dieses Gutes ins Zentrum der Begründung der Schutzwürdigkeit. Diese Differenzen zeigen, für eine Auseinandersetzung mit dem »geistigen Eigentum« ist die Klärung der Frage, welches Gut im ‚Geistigen Eigentum‘ geschützt werden soll, unverzichtbar. Berücksichtigt man die gesellschaftlichen und technischen Veränderungen des vergangenen Jahrhunderts, so erscheint es allerdings fraglich, ob zu dieser Klärung Eigentumstheorien des 18. Jahrhunderts einen fruchtbaren Beitrag zu leisten vermögen. Inwiefern Hegels Überlegungen hier – trotz der geschichtlichen Distanz – einen entscheidenden Differenzierungsbeitrag leisten, sollen die nachfolgenden Überlegungen zeigen.

Bis ins 18. Jahrhundert wird der Schutz geistigen Eigentums überwiegend als Privileg gewährt. Das Anliegen der Verleger, diesen Genuss in ein Recht zu verwandeln, lehnte Ludwig XVI 1777 mit den Worten ab: »Ein Privileg im Buchhandel ist eine Gnade, die sich auf die Gerechtigkeit gründet.«<sup>2</sup> Da der Geltungsbereich dieser Privilegien auf den Herrschaftsbereich des Monarchen beschränkt ist, widmet sich jenseits der französischen Landesgrenzen eine ganze Industrie dem Geschäft des Raubdrucks.<sup>3</sup> Vom wirtschaftlichen Erfolg abgesehen trägt dieser Industriezweig in entscheidendem Maße dazu bei, die Ideen der Aufklärung unters Volk zu tragen. Bei Autoren und Verlegern stieß diese Praxis modernen »Raubrittertums« allerdings nicht immer auf Wohlwollen. Hegel geht in seinen 1820 erschienenen »Grundlinien der Philosophie des Rechts«<sup>4</sup> auf diese Problematik ein, und fordert, der Staat solle Künste und Wissenschaften dadurch befördern, dass er die Autoren vor Diebstahl schützt. Hegels Forderung macht deutlich, für die Frage nach dem Rechtsanspruch auf Schutz von geistigem Eigentum rückt weniger der Schutzanspruch der Autoren als

---

2 Rechtlicher Schutz wurde lediglich in England gewährt, und zwar seit dem Jahr 1712 durch das Statute of Anne.

3 Robert Darnton zeigt in seiner Studie zur »Wissenschaft des Raubdrucks«, wie erfolgreich diese Industrie war.

4 Georg Wilhelm Friedrich Hegel: Grundlinien der Philosophie des Rechts, Hamburg 51995.

die politische Zielsetzung in Zentrum. Indem Hegel den Zweck, den ein solcher Schutz verfolgt, in seine Forderung einbezieht, distanziert er sich von dem Anspruch, dieser Schutz sei allein im Rückgriff auf die Rechte der Person begründbar. Dass Hegels Konzeption gleichwohl nicht – wie Ludwig XVI in seiner Stellungnahme – vom rechtlosen auf Gnade angewiesenen Untertanen ausgeht, wird deutlich, wenn seine Forderung in das rechtsphilosophische Gesamtkonzept zurückgestellt wird. Der in den »Grundlinien« entwickelte Rechts- und Eigentumsbegriff reflektiert zum einen den Anspruch des modernen Individuums auf Selbstbestimmung, zum anderen wird dieser Anspruch in den Kontext einer Neubestimmung der gesellschaftlichen Ordnung und der politischen Systeme gestellt. Hegel unterscheidet zwischen den Rechten, die die Individuen aufgrund ihres Person- bzw. Subjektseins einfordern, und den Handlungsformen, die diese Rechte allererst sicherstellen und verwirklichen. Welche Rolle das geistige Eigentum in diesem Zusammenhang hat, soll nachfolgend geklärt werden. Hierfür ist es sinnvoll, zunächst die Rahmenbedingungen des Hegel'schen Eigentumsbegriffs zu skizzieren, um dann die Konzeption des »geistigen Eigentums« in der Rechtsphilosophie zu entwickeln.

## **DIE RAHMENBEDINGUNGEN DES HEGEL'SCHEN EIGENTUMSBEGRIFFS**

Der Begriff »Eigentum« wird bis in die Mitte des 18. Jahrhunderts hinein synonym mit »Herrschaft« gesetzt und steht für eine Bedeutungskongruenz von Habe- und Hoheitsrechten. D.h. beide Begriffe erfassen neben der Sachherrschaft auch immaterielle Rechte, so genannte Hoheitsrechte, die die Befugnisse eines Staates, gegenüber dem Bürger tätig zu werden, festschreiben. Ende des 18. Jahrhunderts wird der Begriff »Herrschaft« zunehmend auf den Bezirk des Hoheitsrechtlichen, d.h. die Befugnis, Regeln zu beschließen und durchzusetzen, eingeschränkt. Mit dem »Eigentum« oder »Dominium« wird dagegen – in struktureller Analogie zur (politischen) Herrschaft – die Gewaltfülle

eines Eigentumssubjekts über die schrankenlos unterworfenen Sache beschrieben. Dass diese Unterwerfung als ein Akt der Freiheit des Individuums verstanden wird, verdankt sich einer zunehmenden »Entpolitisierung« des Freiheitsbegriffs: »Freiheiten« sind nicht länger Privilegien, die Berechtigungen erteilen, »Freiheit« steht vielmehr für die Entscheidungssouveränität handelnder Subjekte.

Dieser »entpolitisierte« Freiheitsbegriff bildet mit dem auf Sachbesitz reduzierten Eigentumsverständnis eine Einheit. In diesem Sinn formuliert Ernst Ferdinand Klein 1790: »Es ist wahr, die persönliche Freiheit ist ein unverletzliches Menschenrecht, und die Heiligkeit des Eigentums ist nur eine Folge davon.«<sup>5</sup> Entscheidend für diese Verknüpfung von Freiheit und Eigentum ist die Überzeugung, dass das Menschenrecht der Freiheit nicht nur einen Schutzanspruch auf körperliche Unversehrtheit und Selbstbestimmung begründet, sondern auch den Anspruch auf Eigentum rechtfertigt.

Noch ein weiterer Gesichtspunkt ist für den Hegel'schen Eigentumsbegriff entscheidend: Kants Kritik an der Arbeits- bzw. Okkupationskonzeption des Eigentums. Für Kant begründet nicht die körperliche Okkupation oder die Arbeit, sondern der Wille<sup>6</sup> des Individuums das rechtliche Eigentumsverhältnis. Kants Kritik an der Arbeitskonzeption von Eigentum ist durch das Problem veranlasst, den Rechtsanspruch auf eine Sache, die nicht in meinem unmittelbaren körperlichen

---

5 Ernst Ferdinand Klein: Freiheit und Eigentum, Berlin 1790, 121.

6 «Wille» wird von Kant synonym für praktische Vernunft gebraucht. Antike und christliche Motive verbindend bestimmt Kant Wille als vernunftbestimmtes Handlungsvermögen. Zwischen der vernünftigen Handlungsbestimmung durch den Willen und dem trieb- und bedürfnisgeleiteten Handeln bilden die Maximen eine Vermittlung. Maximen (das sind die zur Regel erhobenen Zwecke und Bedürfnisse) bestimmen als »gebildeter Wille« für Kant das Handeln eines nicht notwendig vernünftigen Wesens. Vgl. Oswald Schwemmer: Wille, in: Jürgen Mittelstrass (Hg.): Enzyklopädie Philosophie und Wissenschaftstheorie, Bd. 4, Stuttgart 1996, 704-707, hier 704.



Besitz ist, zu begründen. Kant macht gegen die Okkupationstheorie geltend, dass für das Vorliegen einer Rechtsbeziehung zwischen Person und Sache nicht die durch das Bedürfnis veranlasste Besitznahme, sondern der freie Wille des Individuums entscheidend ist. »Eigentum« als Rechtstitel geht aus der freien Handlung des Individuums hervor und hat damit losgelöst von der faktischen Innehabung einer Sache Geltung.

Dieser Eigentumsbegriff bildet auch die Grundlage für Kants Bestimmung des »geistigen Eigentums«. Am geistigen Eigentum unterscheidet Kant zwischen der »Rede« als dem vom Autor Geschaffenen und dem gegenständlichen, veräußerbaren (Druck-)Werk. Diese Unterscheidung führt dazu, dass Kant mit Blick auf »geistiges Eigentum« von einem gestuften Eigentumsrecht spricht: Die »Rede« ist das geistige Eigentum des Autors, für den Druck dieser Rede benötigt der Verleger die ausdrückliche Vollmacht des Verfassers.<sup>7</sup> Gegen das Eigentumsrecht des Autors verstößt, wer Bücher ohne Vollmacht nachdruckt. Der Nachdrucker macht sich eines Rechtsbruchs schuldig, weil er dem rechtmäßigen Besitzer den rechtmäßigen Vorteil entzieht. Die von Kant am geistigen Eigentum unterschiedenen Aspekte fordern unterschiedliche Schutzkonzepte: als öffentliche Rede ist die Handlung des Autors über das Persönlichkeitsrecht zu schützen, als Druckexemplar ist das literarische Erzeugnis dagegen Gegenstand des Sachenrechts.

Zusammenfassend kann mit Blick auf den Schutzanspruch geistigen Eigentums festgehalten werden:

1. Die Einschränkung des Eigentumsbegriffs auf die Herrschaft eines Subjekts über eine Sache und
2. Kants Bestimmung des »Eigentums« als Rechtstitel, bilden wie auch die Stufung des geistigen Eigentumsbegriffs den Rahmen für die Hegel'sche Konzeption des geistigen Eigentums.

---

7 Fichte verschärft diese Bedingung noch, wenn er erklärt die Verfügungsbezugnis über den Text des Autors ist jeglicher Zueignung entzogen und ist unveräußerliches Eigentum des Autors.

## DAS »SELBSTBEWUSSTSEIN« UND SEIN ›WERK‹

In den tagespolitischen Beiträgen – wie etwa der Württemberg-Schrift<sup>8</sup> – reflektiert Hegel Mitte der zwanziger Jahre den Wandel im Eigentumsbegriff und die Folgen für das Verfassungs- bzw. Herrschaftsverständnis: Die Neuordnung Württembergs auf der Basis einer Verfassung fordert den Verzicht auf alle ständischen Privilegien und die strenge Trennung von privaten und öffentlichen Rechten.<sup>9</sup> Die Beantwortung der Frage, warum der Verzicht auf Eigentum und Herrschaft als Freiheitsverwirklichung zu begreifen ist, gibt Hegel in seinen Grundlinien der Philosophie des Rechts.

»Recht«, so Hegel einleitend, ist das »Dasein der Freiheit«. »Recht« ist kein idealer Zustand, sondern die Wirklichkeit der Freiheit in konkreten Handlungen. Mit dieser Definition nimmt Hegel eine Kritik auf, die schon früh von Seiten der Jurisprudenz gegen Kants Rechtslehre vorgetragen wurde: Der von Kant entwickelte Rechtsbegriff formuliert ein bloßes Ideal und ist nicht geeignet, als Leitfaden für die Gesetzgebung oder die Rechtsprechung zu dienen. Kant, so der allgemeine Vorwurf, ist es nicht gelungen, einen Bogen zu schlagen zwischen dem vernünftigen (idealen) Rechtsbegriff und dem faktischen Recht. Hegel teilt diese Kritik und entwickelt einen alternativen

---

8 Vgl. Georg Wilhelm Friedrich Hegel: Verhandlung in der Versammlung der Landstände, in: ders.: Gesammelte Werke, Bd. 15, Schriften und Entwürfe I (1817–1825), hrsg. v. Friedrich Hogemann u. Christoph Jamme, Hamburg 1990. Zu Hegels politischen Schriften, vgl. Elisabeth Weisser-Lohmann: Hegels politische Schriften, in: Paul Cobben (Hg.): Hegel-Lexikon, Darmstadt 2006, 85-91.

9 Eigentumsverhältnisse sind von der Herrschaft über Menschen zu trennen. Gegen die württembergischen Stände, die auf ihre angestammten Rechte nicht verzichten wollen, behauptet Hegel der vom königlichen Verfassungsvorschlag geforderte Verzicht auf Privilegien sei als Verwirklichung von Freiheit zu begreifen. Vgl. Hegel: Verhandlung in der Versammlung der Landstände, 126ff.

Rechtsbegriff. Grundlage dieses Begriffs bildet seine Theorie des Wissens bzw. seine Bewusstseinstheorie. Da sowohl der Hegel'sche Rechtsbegriff als auch seine Eigentumslehre ohne diese Lehre unverstandlich bleiben, sollen die Grundzuge dieser Theorie hier skizziert werden.

In der 1807 erschienenen Phanomenologie des Geistes fragt Hegel nach den Bedingungen des Wissens, bzw. der Wahrheit. Die Phanomenologie – ursprunglich unter dem Titel »Wissenschaft der Erfahrung des Bewusstseins«<sup>10</sup> konzipiert – soll zeigen, dass Erfahrung nicht einlinig auf eine bestimmte Erkenntnis festgelegt ist, wie etwa bei Kant auf das Erkennen von Erscheinungen. Hegel unterscheidet vielmehr zwischen einer unmittelbaren, der begriffenen und der wahrhaften Erfahrung. Diese Differenzierung bildet das Instrumentarium zur Prufung der verschiedenen Wissensanspruche. Leitend ist dabei die Frage nach den Bedingungen unter denen wir davon sprechen, dass jemand uber »Wissen« verfugt. Hegel klart diese Frage am Leitfaden einer stufenformigen Abfolge von Erfahrungen, die vom »Meinen«, das seine Gewissheit aus der sinnlichen Erfahrung schopft, uber die ‚Wahrnehmung‘ und den »Verstand« zur »Gewissheit«, die das selbstbewusste Denken fur sich in Anspruch nimmt, fuhrt. Der Prufungsprozess zeigt, jede dieser Erfahrungen geht auf fruhere Erfahrungen zuruck, ja ist ohne diese fruheren Erfahrungen gar nicht verstandlich zu machen. Die kunftigen Erfahrungen zeigen wiederum die nur begrenzte Gultigkeit der gegenwartigen »Wahrheiten«. »Wahrheiten« sind nicht isolierte Erkenntnisleistungen, sondern basieren auf vergangenen Erfahrungen und integrieren diese in spezifischer Weise.

Als Bewusstsein bzw. Selbstbewusstsein sucht das Bewusstsein seine »Wahrheit« nicht in den Wahrnehmungen und Erfahrungen der Auenwelt, sondern in sich selbst. Das Selbstbewusstsein tritt mit dem Anspruch auf, der auere Gegenstand sei das Produkt seiner inneren

---

10 Zur Titelanderung und zur Frage des Konzeptionswandels siehe Otto Pogeler: Hegels Idee einer Phanomenologie des Geistes, Freiburg, Munchen 1993, 156ff.

Tätigkeit. Als äußerer Gegenstand ist dieser Gegenstand aber auch für andere Subjekte. Auch sie behaupten, dieser Gegenstand sei der ihre und es sei ihnen nur um diesen ihren Gegenstand zu tun. Die Prüfung dieser Ansprüche zeigt allerdings, dass alle irren: Indem die Sache äußerlich ist, kann es nicht um die Sache als diese »einzelne zu tun« sein, vielmehr geht es um die Sache »als [...] ein Allgemeines, das für alle ist«. <sup>11</sup> Die Sache als Produkt der inneren Tätigkeit des Bewusstseins kommt nur als diese einzelne in den Blick. Ihr steht die objektive Allgemeinheit der Sache gegenüber. Dies führt zu Konflikten sowohl zwischen den verschiedenen Ansprüchen der selbstbewussten Individuen als auch der gegenständlichen Objektivität.

Die in der »Phänomenologie des Geistes« als Erfahrung des Bewusstseins entwickelte Struktur und Verfassung des Selbstbewusstseins kehrt in der Geistphilosophie, bzw. der späteren Realphilosophie in den »Erfahrungen«, die das Individuum als Person macht, wieder. Diese Wiederkehr logischer Grundstrukturen darf nicht dazu führen, dass die Differenzen zwischen logischen und realphilosophischen Bestimmungen verwischt werden. Vielmehr muss in diesem Zusammenhang berücksichtigt werden, dass die Bestimmungen der praktischen Philosophie (Person, Subjekt, Sittlichkeit) das Resultat der Einführung weiterer Bestimmungen sind, und nicht unmittelbar aus den logischen Strukturen zu gewinnen sind.<sup>12</sup> Die Struktur des Bewusstseins bildet in der Eigentumslehre der Rechtsphilosophie den Leitfaden für die Explikation des Rechtsbegriffs.

---

11 Georg Wilhelm Friedrich Hegel: Phänomenologie des Geistes, Hamburg 1988, 275. Das Selbstbewusstsein setzt voraus, dass die wahre Realität keine gegenständliche sondern vielmehr die Realität des Selbstbewusstseins ist. In der Herrschafts- Knecht-Beziehung wird diese Voraussetzung geprüft. Vgl. Ludwig Siep: Anerkennung als Prinzip der praktischen Philosophie. Zu Hegel Jenaer Philosophie des Geistes, Freiburg 1979.

12 Von zentraler Bedeutung für diese Weiterbestimmung ist zum einen die Einführung der Idee als Form eines Handelns, das sich selbst verständlich ist, zum anderen das Wollen als Zwecktätigkeit.

Als Personen behaupten Individuen von bestimmten Werken, Gedanken und Ideen, sie seien ihr ausschließliches Eigentum. Dieser Rechtstitel berechtige dazu, andere von der Nutzung auszuschließen. Die hier entstehenden Konflikte rekonstruiert Hegel, indem er den hier bestehenden Widerspruch deutlich macht: das von jedem einzelnen in Anspruch genommene Recht ist ein rein auf der individuellen Ebene anerkanntes Recht. Zur Entscheidung der Konflikte ist aber ein allgemeines, von allen anerkanntes Recht notwendig. Dieses allgemeine Recht muss sowohl die individuellen Ansprüche rechtfertigen als auch einen anerkannten Maßstab für die Beurteilung der konkurrierenden Ansprüche bereitstellen.

## **DAS »INNERE EIGENTUM« IN HEGELS GRUNDLINIEN**

Vor dem Hintergrund der oben entwickelten Bewusstseinsstruktur verfehlt Kants Lösung der Frage nach dem Schutz von geistigem Eigentum ihr Ziel. Die Unterscheidung zwischen der Rede des Autors und dem durch die Verleger veröffentlichten Werk geht erstens davon aus, dass zwischen individuellem und allgemeinem Anteil an einem Werk genau unterschieden werden kann. Hegels Darstellung des »Werdens des Wissens« in den vielfältigen Erfahrungen hat gezeigt, dass Erfahrung, Wissen und Handeln ohne die Erfahrungen, das Wissen und das Handeln der anderen gar nicht möglich wäre. Kants Unterscheidung zwischen dem schöpferischen Anteil und dem objektiven, gegenständlichen Werk erweist sich in der praktischen Anwendung nicht nur als ungenau. Der Vorwurf des Nachdrucks lässt sich ebenso zurückweisen wie derjenige des Plagiats. In beiden Fällen genügen geringste Änderungen am Original, um den Anspruch, hier handele es sich um ein neues Werk, zu rechtfertigen. Für Hegel wird damit Kants gestufter Eigentumsbegriff der Komplexität geistigen Eigentums nicht gerecht. Darüber hinaus erfasst Kant zwar die Strukturen geistigen Eigentums, die Begründung des jeweiligen Schutzanspruchs bleibt aber hinter den

moralphilosophischen Ansprüchen Kants zurück, wenn er den Schutzanspruch mit Blick auf die Konsequenzen eines solchen Diebstahls, den dem Autor entstehenden Schaden, begründet. Die von Hegel am Bewusstsein aufgewiesene Struktur zeigt, dass auf beiden Stufen des Eigentums (Rede und Drucktext der Rede) individuelle Bestimmtheit und Allgemeingut ineinander verwoben sind. Unendliche Streitereien lassen sich daher um den berechtigten Anspruch eines Individuums an einer Sache führen. Und diese Prozesse werden im bürgerlichen Recht auch geführt, allerdings ohne dass die Begründung des Rechtsanspruchs auf geistiges Eigentums geklärt ist.

Für das Verständnis der Hegel'schen Eigentumskonzeption ist es wichtig, den dreigliedrigen Argumentationsaufbau der Grundlinien im Blick zu haben. Die Behandlung des »Eigentums« im Abschnitt »Abstraktes Recht« darf nicht dazu führen, dass die Auseinandersetzung mit Hegels Eigentumskonzeption auf diesen Abschnitt beschränkt wird. Der Abschnitt »Moralität« insbesondere aber der Abschnitt »Sittlichkeit« ist in die Auseinandersetzung um den Hegel'schen Eigentumsbegriff einzubeziehen. Die argumentative Funktion der einzelnen Abschnitte verdeutlicht diese Notwendigkeit.

Die Strukturprobleme, die für das »Selbstbewusstsein« bestimmend waren und die für das Personsein und das Recht auf Eigentum wiederkehren, können nur gelöst werden, wenn es gelingt, einen unabhängigen Inhalt aufzuweisen, der zum einen gegenüber den behaupteten Inhalten befugt ist, als Maßstab zu fungieren, zum anderen aber auch die Geltung dieser Ansprüche sichert. Der im »Abstrakten Recht« entwickelte Rechtsbegriff formuliert lediglich den Anspruch, als Person anerkannt zu werden. Dieses »Personenrecht« bildet aber erstens keine Instanz, die allgemeine Anerkennung genießt und befugt wäre, die hier auftretenden Kontroversen zu lösen. Zum anderen wird dieses »Recht« zwar eingefordert, aber es ist keine Institution, die diese Rechte verwirklicht. Die Verwirklichung meines Anspruchs, als Person anerkannt zu sein, bleibt daher zufällig. Wie die Forderung der Verwirklichung der beiden Rechtsbestimmungen oder Rollen, Person und Subjekt zu sein, und die damit verbundenen Rechte – wie das Recht auf Eigentum

– eingelöst werden kann, entwickelt Hegel im dritten Abschnitt der Grundlinien.

Im ersten Abschnitt der Rechtsphilosophie werden zunächst die mit dem Personsein verbundenen Rechte entwickelt: das Recht auf Eigentum und das Recht Verträge zu schließen. Mit dem Anspruch »Person zu sein« werden alle individuellen Bestimmungen der Individuen ignoriert und Gleichheit erzeugt, insofern hier das Rechtsgebot lautet: »sei eine Person und respektiere die anderen als Personen«<sup>13</sup>. Als Person kommt jedem das gleiche Recht zu, Dinge in Besitz zu nehmen. Das Verhältnis zu anderen Personen bleibt an die in Besitz genommenen Sachen gebunden. Der andere begegnet mir hier ausschließlich als Eigentümer einer Sache.

Diese Personenkonzeption bildet die Ausgangsbasis für die Darstellung des Eigentumsbegriffs. Dabei folgt Hegels Darstellung zwar der tradierten Aufteilung in »Besitznahme«, »Gebrauch der Sache«, »Entäußerung« und »Vertrag«<sup>14</sup>. Hegel bestimmt diese Aspekte allerdings als Willensmomente, d.h. wie bei Kant ist es nicht die körperliche Okkupation, die mich zum Besitzer einer Sache macht, sondern die Inbesitznahme erfolgt (vorläufig) allein durch den Willen des Besitznehmers. Für die Besitznahme ist die Unterscheidung zwischen körperlicher und geistiger Besitznahme zunächst bedeutungslos. Besitzen kann ich jede Sache, der Selbstständigkeit und Bestimmtheit fehlt. Die Besitznahme ist ein äußerliches Tun und bleibt unvollkommen oder unbestimmt: »Je mehr ich mir die Form der Materie aneigne, desto mehr komme ich in den wirklichen Besitz der Sache«. Das Verzehren von Nahrungsmitteln vollzieht ebenso wie die Ausbildung meines organischen Körpers zu Geschicklichkeiten oder die Bildung meines Geistes eine solche Durchdringung. Ein Unterschied zwischen körperlicher und geistiger Inbesitznahme besteht allerdings insofern, als es

---

13 Hegel: Grundlinien, 52 (§ 36).

14 Vgl. § 53: Das Verhältnis des Willens zur Sache ist a) unmittelbar in der Besitznahme, b) negativ im Gebrauch und c) reflexiv, in der Veräußerung der Sache, insofern der Wille hier aus der Sache in sich zurückkehrt.

mein Geist ist, mit dem ich mir eine Sache vollkommen zu eigen mache. Eine Besitznahme ist gegenüber jeder Sache möglich: »Die Person hat das Recht in jede Sache ihren Willen zu legen«, es besteht ein »absolutes Zueignungsrecht des Menschen«<sup>15</sup>. Als bloßes Ding ist die Sache ohne Bestimmung, erst die Inbesitznahme verleiht ihr eine Bestimmung.

Eigentümer dieser Sache werde ich erst über den ganzen Gebrauch der Sache. Bei der Besitznahme bilden der besitznehmende Wille und die Sache eine Einheit. Im Gebrauch der Sache tritt der Besitzende mit seinen besonderen Bedürfnissen an die Sache heran, zwischen Sache und Wille entsteht eine Differenz: Im Gebrauch soll die Sache meine Bedürfnisse befriedigen. Hegel wendet sich mit dieser Eigentumsbestimmung gegen das römische Recht, das am Eigentum die »*proprietas semper*« und den »*ususfructus*« unterscheidet. Für Hegel zeugt allein der tatsächliche Gebrauch der Sache für die Realität des Eigentums;

»Wenn der ganze Umfang des Gebrauchs mein wäre, das abstrakte Eigentum aber eines anderen sein sollte, so wäre die Sache als die meinige von meinem Willen gänzlich durchdrungen [...] und zugleich darin ein für mich Undurchdringliches, der und zwar leere Wille eines anderen.«

Dieser Widerspruch ist nur durch den Begriff des Volleigentums zu vermeiden: Eigentum ist weder teilweise noch temporär sondern »wesentlich freies, volles Eigentum«.<sup>16</sup>

---

15 Hegel: Grundlinien, § 44. Zum Umfang der Dinge, die geistiges Eigentum werden können, siehe Daniel Stengel: *Intellectual Property in Philosophy*, in: *Archiv für Rechts- und Sozialphilosophie*, Stuttgart 1990 (2004), 1, 25ff.

16 Hegel: Grundlinien, § 62. Politisch bedeutsam wird diese Eigentumskonzeption in der Auseinandersetzung um den Eigentumsstatus der Lehen: Ist der Grundherr oder aber der seit Generationen den Boden bearbeitende Lehnsnehmer Eigentümer?



Der Gebrauch eines Eigentums steht unter dem Aspekt seiner Brauchbarkeit. Diese Brauchbarkeit wird durch die spezifischen Bedürfnisse bestimmt. Der Vergleich mit anderen Sachen von derselben Brauchbarkeit ergibt den Wert, die Allgemeinheit der Sache. Der Gesichtspunkt der Brauchbarkeit betrifft nicht nur dingliche Eigentümer, sondern schließt auch Fähigkeiten und Geschicklichkeiten ein, auch diese können versachlicht und als Eigentum veräußert werden.<sup>17</sup>

Mit Blick auf den »Gebrauch« zeigen körperliche und geistige Besitztümer somit keine Unterschiede. Erst bei der Entäußerung des Eigentums werden die Differenzen zwischen diesen Gütern deutlich. Zunächst stellt Hegel fest, dass »Veräußerbar eine Sache nur [ist], insofern sie ihrer Natur nach ein Äußerliches ist. Güter, welche meine eigenste Person und das allgemeine Wesen meines Selbstbewusstseins ausmachen, sind unveräußerlich.« D.h. bestimmte »geistige Güter«, wie meine Fähigkeit zur Selbstbestimmung, sind unveräußerbar. Damit schließt Hegel aus, dass die Freiheit zur Selbstbestimmung das Recht einschließt, diese Freiheit zu veräußern, um in Abhängigkeit und Sklaverei zu leben. Geistige Produktionen haben die Eigentümlichkeit, dass hier die »Art und Weise der Äußerung unmittelbar in [eine] solche Äußerlichkeit einer Sache umschlagen kann, die nunmehr ebenso von anderen produziert werden kann.«<sup>18</sup> Mit der Veröffentlichung eines Textes eröffnet der Autor die Möglichkeit, dass andere diesen Text gleichfalls produzieren.

Indem Hegel den Gebrauch einer in Besitz genommenen Sache zum zentralen Merkmal des Eigentums erklärt, kann der freie Gebrauch einer in Besitz genommenen Sache, etwa die Aufführung eines veröffentlichten Theater- oder Musikstücks, nicht als Eigentumsverlet-

---

17 Ritter verweist insbesondere auf diese Versachlichtung aller menschlichen Beziehungen in der bürgerlichen Gesellschaft. Siehe Joachim Ritter: Person und Eigentum. Zu Hegels »Grundlinien der Philosophie des Rechts« § 34 bis 81«, in: Manfred Riedel: Materialien zu Hegels Rechtsphilosophie, Bd. 2, Frankfurt/M. 1975, 162ff.

18 Hegel: Grundlinien, § 68; 74.

zung gekennzeichnet werden. »Geschicklichkeiten usf. werden erst Sachen durch meine Entäußerung, d. i. die Äußerlichkeit, die ich ihnen in der Äußerung gebe, die sie in der Äußerung erhalten.«<sup>19</sup> Eine Rechtsverletzung läge dann vor, wenn dieses Äußerlichmachen als Veräußerung missverstanden und von anderen in Besitz genommen wird. Eine Rechtsverletzung läge dann vor, weil die Sache »dem in der Zeit zufällig Ersten, der sie in Besitz nimmt, gehört und weil ein Zweiter nicht in Besitz nehmen kann, was bereits Eigentum eines anderen ist.«<sup>20</sup> Die Kennzeichnung einer Besitznahme erfolgt über äußerlich gegebene Formen und Zeichen, wo diese Zeichen aber ohne die Gegenwart des Willens des Besitzers, d.h. wo dieser Besitz nicht gebraucht wird, wird die Sache herrenlos: »Ich verliere oder erwerbe daher Eigentum durch Verjährung.«<sup>21</sup>

Gegenüber der römischen Unterscheidung zwischen dem Eigentum an der Sache und dem Eigentum des Gebrauchs vertritt Hegel einen Eigentumsbegriff, der die rechtliche Innehabung an den Gebrauch knüpft. Dieser Eigentumsbegriff bildet die Grundlage für das dritte Moment am Eigentum: die Entäußerung. Erst unter diesem Gesichtspunkt geht Hegel auf die Schwierigkeiten geistiger Produktionen ein. Die Veröffentlichung eines Musikstücks in Form von Noten versetzt den Käufer nicht nur in die Lage, das Musikstück aufzuführen, darüber hinaus lässt sich der Gedanke fassen, die ›Idee‹ des Stücks in Besitz zu nehmen und unter eigenem Namen zu veröffentlichen. Mit der Veräußerung eines literarischen Werks etwa will der Autor lediglich den vollen Gebrauch und Wert des einzelnen Exemplars veräußern, nicht aber die Befugnis zur Nutzung »der allgemeine Art und Weise«, diese Sache zu vervielfältigen. Ist diese Unterscheidung zwischen der besonderen und der allgemeinen Benutzung mit Hegels Konzeption des Eigentums als Gebrauch vereinbar? Die feste Verbindung von Eigentum und Gebrauch scheint beim geistigen Eigentum aufgelöst, wenn Hegel hier

---

19 Hegel: Grundlinien, Notizen 330.

20 Hegel: Grundlinien, § 50; 61f.

21 Hegel: Grundlinien, § 64; 71.

zwischen dem Eigentum der Sache und dem Gebrauch d.h. der mit ihr gegebenen Möglichkeit, sie gleichfalls zu produzieren, unterscheidet.

Hegel nimmt diese Unterscheidung aus der Rechtspraxis seiner Zeit auf. Dort wird zwischen der Veräußerung eines einzelnen Exemplars und der Veräußerung der allgemeinen Art und Weise des Gebrauchs unterschieden. Während die Veräußerung eines einzelnen Exemplars, das den vollen Wert dieser Sache besitzt, zum »bloßen« Gebrauch derselben berechtigt und den Erwerber zum vollkommenen und freien Eigentümer derselben macht, befähigt die Veräußerung der allgemeinen Art und Weise des Gebrauchs dazu, dieses Produkt zu vielfältigen oder gleichfalls zu produzieren. Mit Hegels Eigentumsbegriff, der die rechtliche Innehabung an den Gebrauch der Sache bindet, scheint diese Unterscheidung nicht vereinbar. Hegel übernimmt diese Unterscheidung mit der Begründung, dass diese Unterscheidung nicht dazu führt, dass hier ein Eigentum veräußert wird, unter der Maßgabe, es nicht zu gebrauchen. Ausgeschlossen wird vielmehr nur eine bestimmte Art des äußerlichen Gebrauchs. Hegels Bindung des Eigentumsbegriffs an das Recht zum Gebrauch der Sache bleibt somit in der Unterscheidung zwischen »bloßem« und »allgemeinem« Gebrauch gewahrt.

Wie kann diese Unterscheidung aber begründet werden? Zur Begründung eines gestuften Eigentumsrechts verwies Kant auf die Folgen, die eine Nichtunterscheidung für den Schöpfer hat: Seine Interessen würden verletzt. Für Hegel ist die Notwendigkeit, zwischen diesen beiden Gebrauchsformen zu unterscheiden, auf der Ebene des bloßen Sachbegriffs nicht zu leisten. Vielmehr muss der Gesichtspunkt der »Nutzung« oder »Benutzung« einer Sache näher bestimmt werden. Der Gebrauch einer in Besitz genommene Sache endet keineswegs zwangsläufig in der Vernichtung dieser Sache. Was für Nahrungsmittel zutrifft, gilt weder für Sachen, die durch die Bearbeitung erst eine bestimmte Funktion erfüllen (etwa das Stück Holz, das durch die Bearbeitung des Schreiners als Tisch Verwendung findet), noch für Kompetenzen und Fertigkeiten, die der einzelne erwirbt, und die ihn etwa dazu befähigen, einen Tisch anzufertigen. Das Eigentum an solchen

Besitztümern kann entweder veräußert werden oder aber als bleibender Besitz, als »Vermögen« bewahrt werden. Als »Vermögen« befähigen diese Besitztümer zur »besonderen Art und Weise des Gebrauchs«. Das »Vermögen« ist »bleibender und sicher Besitz«. Besitz wird dort zu einem bleibenden, wo der Einzelne sein besonderes Bedürfnis, seine Begierde auf die Sache zugunsten der Sorge für ein Gemeinsames zurückstellt.<sup>22</sup> »Bleibender Besitz« basiert auf gemeinsamen Handlungszwecken.

Es ist eine Entscheidung des ersten Produzenten, die Möglichkeit des allgemeinen Gebrauchs »für sich zu behalten, oder als einen Wert zu veräußern oder für sich keinen Wert darauf zu legen und mit der einzelnen Sache auch sie preiszugeben«<sup>23</sup>. Hegel hält beide Optionen für zulässig. Dass Hegel allerdings die Möglichkeit favorisiert, mit der Veräußerung des bloßen Gebrauchs auch den besonderen Gebrauch preiszugeben, wird deutlich, wenn er darauf verweist, dass diese Möglichkeit an der Sache nicht nur den Aspekt der Besetzung, sondern den Gesichtspunkt des Vermögens hervortreten lässt.

Die Frage nach dem rechtlichen Status bzw. der Schutzwürdigkeit »geistigen Eigentums ist für Hegel eine Frage nach der Stellung bzw. Schutzwürdigkeit bestimmter Vermögen. »Vermögen« ist ein Besitz nur dort, wo Fähigkeiten und Talente (aber auch die materiellen Güter) zur Verfolgung gemeinsamer Zwecke eingesetzt werden.<sup>24</sup> Wird der

---

22 Hegel erläutert dies zunächst mit Blick auf die Familie: »Die Familie hat nicht nur Eigentum, sondern für sie als allgemeine und fortdauernde Person tritt das Bedürfnis und die Bestimmung eines bleibenden und sicheren Besitzes, eines Vermögens ein. Das im abstrakten Eigentum willkürliche Moment des besonderen Bedürfnisses des bloß Einzelnen und die Eigenschaft der Begierde verändert sich hier in die Sorge und den Erwerb für ein Gemeinsames, in ein Sittliches. Hegel: Grundlinien § 170, 156.

23 Hegel: Grundlinien, § 69, 75.

24 Bei den Handlungszwecken unterscheidet Hegel – im Abschnitt »Moralität« – zwischen der bloßen Absicht, einem bestimmten eng umgrenzten Zweck (Hegel nennt als Beispiel das Anzünden eines Stück Holzes). Der

»allgemeine« Gebrauch einer Sache mit dem Verkauf des »bloßen« Gebrauchs preisgegeben, so reflektiert diese Preisgabe, dass der Gebrauch der in die Sache investierten Kenntnisse und Fertigkeiten von allgemeinem Interesse ist. Dieses allgemeine Interesse resultiert zum einen aus der Herkunft der individuellen Leistung, die die Sache hervorgebracht hat. Diese Leistung war nur im Austausch mit anderen Leistungen möglich. Die Allgemeinheit resultiert aber auch aus dem gemeinsamen Nutzen, dem Zweck, dem die Sache dient. Diese ›Brauchbarkeit‹ bestimmt ihren Wert als Vermögen und führt zu der Forderung, dass dieses Gut dauerhaft verfügbar ist. Ihre Verfügbarkeit eröffnet Handlungsoptionen, die das Gut auf Dauer sichern. Im Verzicht auf die Nutzung der besonderen Rechte an einem ›geistigen Eigentum‹ setzt der erste Produzent andere in die Lage, diese gleichfalls zu nutzen, die Brauchbarkeit der Sache wird von der individuellen zu einer allgemeinen, sie dient damit gemeinsamen, ›sittlichen‹ Zwecken.

Die Frage nach der Schutzwürdigkeit dieses Vermögens weist damit über das Personenrecht hinaus auf die politische Sphäre. Hegel präziserte den Begriff des »Geistigen Eigentums« mit Blick auf das in diesen Gütern vorhandene Vermögen, Handlungsspielräume zu stabilisieren oder zu eröffnen. Schutzwürdig sind Vermögen dort, wo gesellschaftlich erwünschte Handlungsspielräume gesichert werden sollen. Hegel diskutiert dieses Problem am Institut des Familienfideikomiß.<sup>25</sup> Die Festlegungen der Erbfolge eines Grundbesitzes im Familienfideikomiß auf den Erstgeborenen gehört zur patriarchalischen Familie und

---

Handelnde hat dabei nicht die Folgen seines Tuns im Blick (die Möglichkeit einen Großbrand auszulösen). Mit seiner Handlung kann das Individuum aber auch ein »Wohl« bezwecken, d.h. der Handelnde ist davon überzeugt, dass das angestrebte Ziel über den Tag und seine Person hinaus von allgemeinem Interesse ist.

- 25 Wo dieses Vermögen in Gefahr ist wie zufälliger Privatbesitz behandelt zu werden, müssen Regelungen zur Sicherung dieser Vermögen getroffen werden.

widerspricht der Freiheit des Eigentums und den Grundprinzipien der Bürgerlichen Gesellschaft (Hegel, »Grundlinien«, Notizen 331). Gleichwohl hat diese Einrichtung unter bestimmten politischen Konstellationen ihre Berechtigung, insofern sie etwa die politische Arbeit für das Allgemeine sicherstellt.

Zu einem »Vermögen« wird Besitz durch die Verfügung, die Sache in den Dienst des Wohls anderer zu stellen. Gegenüber der für das Abstrakte Recht konstitutiven Beziehung zwischen Person und Sache, die die Beziehung zur anderen Personen über eine Sache definiert, kommt es hier zu einer Umkehrung: In den sittlichen Handlungen ist die Funktion der Sache über das Verhältnis der Individuen zueinander definiert.

Welche Konsequenz hat dieser Eigentumsbegriff bzw. diese Vermögenslehre für die Forderung nach dem Schutz von geistigem Eigentum? Die auf der Ebene des abstrakten Rechtsbegriffs erhobenen Ansprüche auf Schutz werden vielfach mit dem Verweis auf die »Ehre« der hier Tätigen beantwortet. Hegel ist, was deren Wirksamkeit betrifft, skeptisch:

»Was aber die Wirkung der Ehre gegen das Plagiat betrifft, so ist dabei dies auffallend, dass der Ausdruck Plagiat oder gar gelehrter Diebstahl nicht mehr gehört wird – es sei, entweder dass die Ehre ihre Wirkung getan, das Plagiat zu verdrängen, oder dass es aufgehört hat, gegen die Ehre zu sein und das Gefühl hierüber verschwunden ist, oder dass ein Einfällchen und Veränderung einer äußeren Form sich als Originalität und selbstdenkendes Produkt so hoch anschlägt, um den Gedanken an ein Plagiat gar nicht in sich aufkommen zu lassen.«<sup>26</sup>

Hegels Skepsis gegenüber einer moralischen Lösung dieses Problems verlagert die Frage auf die Ebene der sittlichen Institutionen. Hegels

---

26 Hegel: Grundlinien, § 69, 77. »Ehre besteht in der Vorstellung, die ein anderer von mir hat – dabei kann ich mich nicht auf einen objektiven Inhalt berufen.« (Hegel: Grundlinien., Notiz zu S. 48, 533).

Staatskonzeption sieht hier zum einen den Rechtsapparat der bürgerlichen Gesellschaft gefordert, der eine Lösung der hier entstehenden Konflikte im Rückgriff auf die Kasuistik des abstrakten Rechts sucht. Zum anderen haben diese Institutionen die Aufgabe, allgemeine Zweckbestimmungen sicherzustellen. In diesem Zusammenhang wird eine positive Beförderung »geistiger Eigentümer« politisch einforderbar. Hegel begründet diese Forderung mit der Einsicht, dass diese Eigentümer zum einen Garanten dafür sein können, dass das Person- und Subjektsein und die damit verbundenen Rechte auf Dauer sichergestellt wird. Zum anderen übernehmen diese Güter eine weitere zentrale politische Aufgabe, indem sie ein »Umschlagen« des selbstsüchtigen Handelns in ein Handeln aus Einsicht in das allgemeine Vermögen und den Zusammenhang, in dem jeder hier Handelnde steht, befördern. Hegel veranschaulicht die Verantwortung der Politik in dieser Frage am Beispiel der öffentlichen Denkmale, die das Eigentum eines Volkes oder einer Kultgemeinde sind. Deren Benutzung zeigt sich im Erinnern und der Ehre, die diesen Gegenständen entgegengebracht wird. Werden Sie von diesem Geist verlassen, werden sie zu zufälligem Privatbesitz, wie die griechischen und römischen Kunstwerke in der Türkei. Sind diese geistigen Güter nicht mehr Gegenstand des Kultes, wohl aber für das geschichtliche Selbstverständnis bestimmend – wie die christlichen Denkmale um 1800 –, so ist es Aufgabe der Politik, nicht nur diese Gegenstände davor zu bewahren, zufälliger Privatbesitz zu werden, sondern auch deren Verfügbarkeit für die Bildung aller – etwa durch Musealisierung – zu sichern.

Hegels Bestimmung des geistigen Eigentums arbeitet in differenzierter Form die Verwobenheit der relevanten Aspekte heraus. Da eine klare Trennung zwischen individuellem und allgemeinem Anteil an einem geistigen Gut kaum möglich ist, weist Hegels Eigentumskonzeption mit der Bindung des Eigentums an den Gebrauch der Sache einen Lösungsweg. Zum einen hat der erste Verfasser das Recht, über die Gebrauchsweisen seines Werkes zu bestimmen. Hegel vertraut hier auf die Einsicht der Produzenten, dass diese Güter sich niemals allein dem schöpferischen Akt des Autors verdanken, dass diese Güter als Eigen-

tum zweitens durch ihren Gebrauch bestimmt sind und daher auch für diesen zur allgemeinen Verfügung gestellt werden sollen. Wo diese Einsicht fehlt, bzw. wo kein Eigentümer zu ermitteln ist, hat die Politik zu prüfen, inwiefern dieses Gut von allgemeinem Interesse ist und der allgemeine Gebrauch sichergestellt werden muss.
